# Supplementary material for: Highly flexible cellulose nanofiber/single-crystal nanodiamond flake heat spreader films for heat dissipation
Source: Royal Society of Chemistry journal article supplement (doi:10.1039/d2tc01830f), 2022-01-01
Supplement: d2tc01830f1.pdf [file d2tc01830f1.pdf]

## Supporting Information

### Highly Flexible Cellulose Nanofiber/Single-crystal Nanodiamond Flake Heat Spreader Films for Heat Dissipation

*Ping Gong<sup>1, 2#</sup>, Linhong Li<sup>1, 2#</sup>, Guang-en Fu<sup>1, 2</sup>, Shengcheng Shu<sup>1</sup>, Maohua Li<sup>1</sup>, Yandong Wang<sup>1</sup>, Yue Qin<sup>1</sup>, Xiangdong Kong<sup>1</sup>, Huanyi Chen<sup>1</sup>, Chengcheng Jiao<sup>1</sup>, Xinxin Ruan<sup>1</sup>, Tao Cai<sup>1, 2</sup>, Wen Dai<sup>1</sup>, Chao Yan<sup>\*3</sup>, Kazuhito Nishimura<sup>4</sup>, Cheng-Te Lin<sup>1, 2</sup>, Nan Jiang<sup>\*1, 2</sup>, Jinhong Yu<sup>\*1, 2</sup>*

*<sup>1</sup>Ningbo Institute of Materials Technology and Engineering, Chinese Academy of Sciences, Ningbo, 315201, China.*

*<sup>2</sup>Center of Materials Science and Optoelectronics Engineering, University of Chinese Academy of Sciences, Beijing 100049, China.*

*<sup>3</sup>School of Materials Science and Engineering, Jiangsu University of Science and Technology, Zhenjiang, 212003, PR China*

*<sup>4</sup>Advanced Nano-processing Engineering Lab, Mechanical Engineering, Kogakuin University, Tokyo, 192-0015, Japan.*

**\*Corresponding author, E-mail: [chaoyan@just.edu.cn](mailto:chaoyan@just.edu.cn) (C. Yan); [jiangnan@nimte.ac.cn](mailto:jiangnan@nimte.ac.cn) (N. Jiang); [yujinhong@nimte.ac.cn](mailto:yujinhong@nimte.ac.cn) (J. Yu).**

**#Both authors are co-first authors and contributed equally to this work.**

## Supplementary Materials

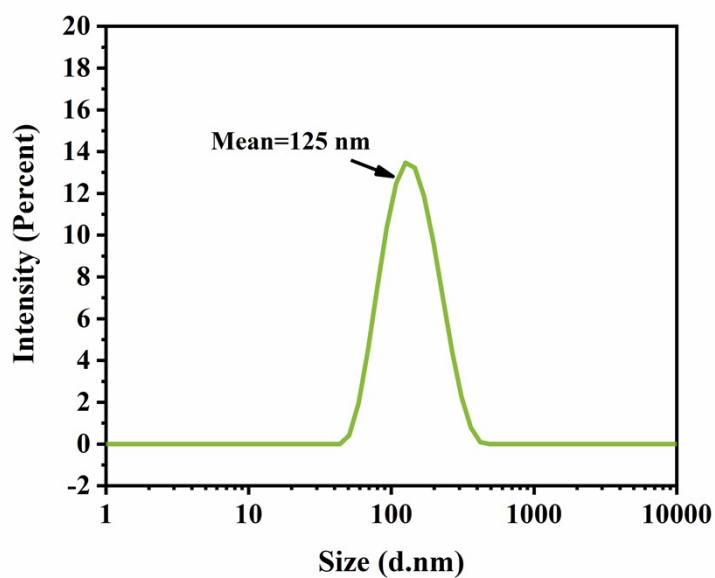

Figure S1. The size distribution of SCND.

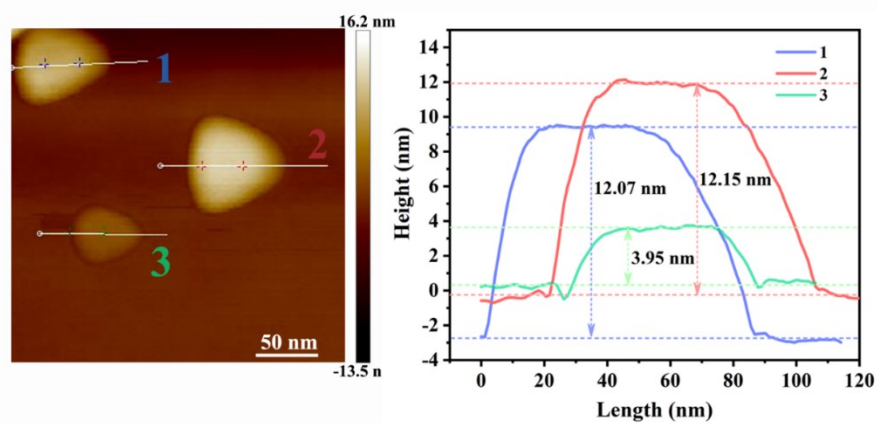

Figure S2. (a) AFM image of SCND; (b) The corresponding height profile.

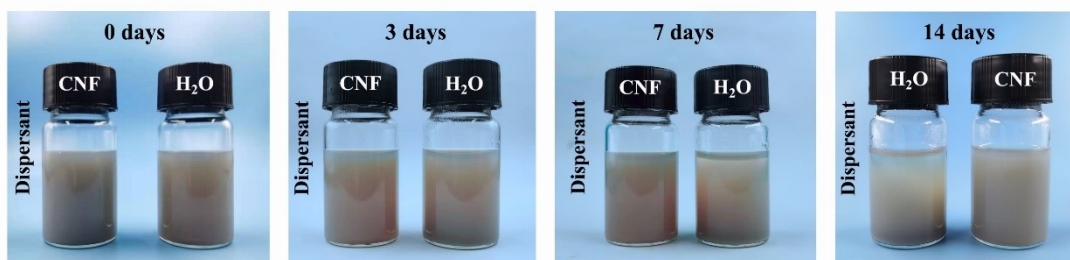

Figure S3. Photographs of SCND dispersion in H<sub>2</sub>O and CNF aqueous solution from 0 to 14 days.

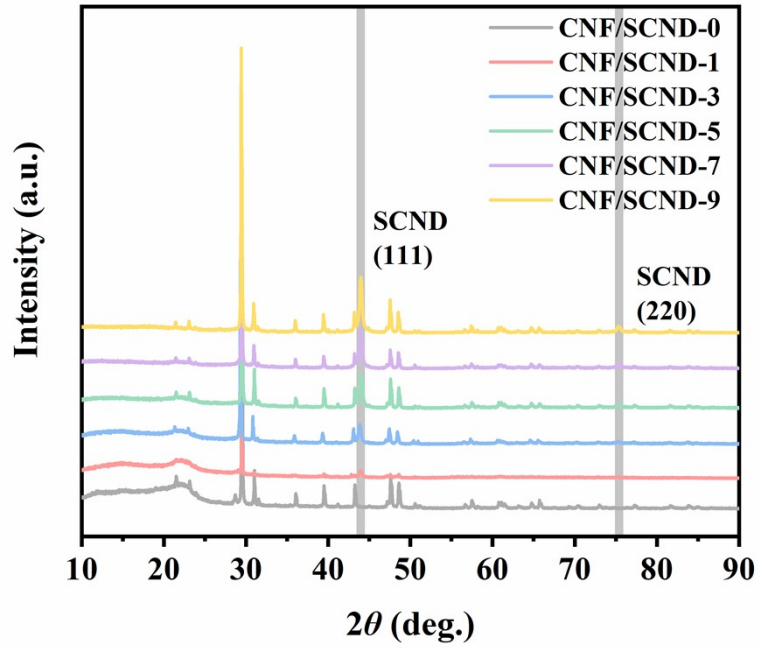

Figure S4. XRD patterns of the CNF/SCND composite films.

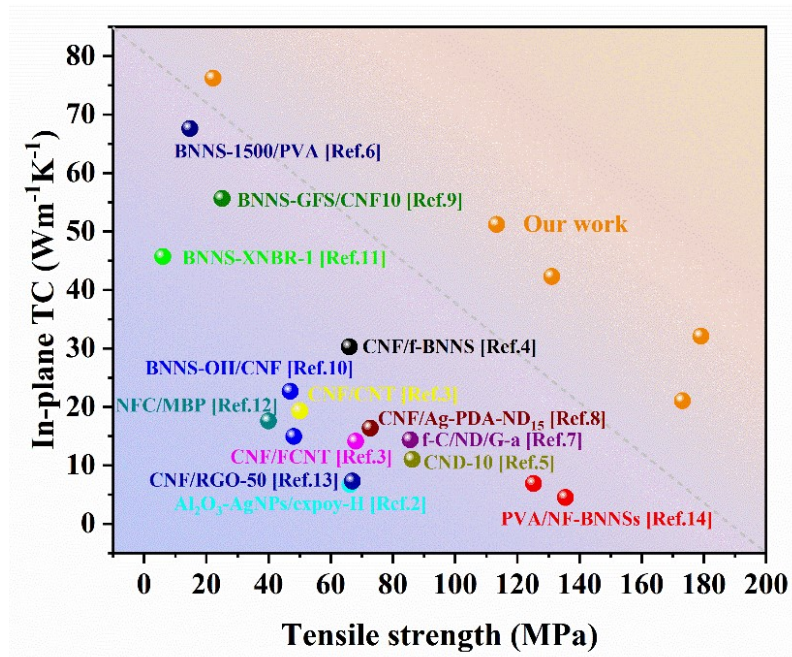

Figure S5: Comparison of the thermal conductivity and tensile strength of the CNF/SCND composite films with those of other similar references<sup>[2-14]</sup>.

**Table S1.** The theoretical binding energies calculated by the relative content and actual test values of CNF/SCND composite films.

| <b>Sample</b> | <b>SCND Contents (wt%)</b> | <b>CNF Contents (wt%)</b> | <b>Theoretical binding energy (eV)</b> | <b>Test binding energy (eV)</b> |
|---------------|----------------------------|---------------------------|----------------------------------------|---------------------------------|
| CNF/SCND-0    | 0                          | 100                       | /                                      | 529.46                          |
| CNF/SCND-1    | 10                         | 90                        | 529.63                                 | 529.54                          |
| CNF/SCND-3    | 30                         | 70                        | 529.98                                 | 529.60                          |
| CNF/SCND-5    | 50                         | 50                        | 530.33                                 | 529.65                          |
| CNF/SCND-7    | 70                         | 30                        | 530.68                                 | 529.54                          |
| CNF/SCND-9    | 90                         | 10                        | 531.03                                 | 529.63                          |
| SCND          | 100                        | /                         | /                                      | 531.2                           |

**Table S2.** The parameters for the calculation of in-plane thermal conductivities of pure CNF and CNF/SCND composite films.

| <b>Sample</b> | <b>SCND Contents (wt%)</b> | <b>Thermal diffusivity (<math>\text{mm}^2\text{s}^{-1}</math>)</b> | <b>Specific heat capacity (<math>\text{J g}^{-1}\text{K}^{-1}</math>)</b> | <b>Density (<math>\text{g cm}^{-3}</math>)</b> | <b>Thermal conductivity (<math>\text{W m}^{-1}\text{K}^{-1}</math>)</b> |
|---------------|----------------------------|--------------------------------------------------------------------|---------------------------------------------------------------------------|------------------------------------------------|-------------------------------------------------------------------------|
| CNF/SCND-0    | 0                          | $0.23 \pm 0.01$                                                    | 1.499                                                                     | 1.616                                          | $0.52 \pm 0.02$                                                         |
| CNF/SCND-1    | 10                         | $8.69 \pm 0.06$                                                    | 1.457                                                                     | 1.716                                          | $21.07 \pm 0.14$                                                        |
| CNF/SCND-3    | 30                         | $10.36 \pm 0.44$                                                   | 1.385                                                                     | 2.05                                           | $29.34 \pm 1.36$                                                        |
| CNF/SCND-5    | 50                         | $15.58 \pm 0.79$                                                   | 1.242                                                                     | 2.186                                          | $42.3 \pm 2.13$                                                         |
| CNF/SCND-7    | 70                         | $21.73 \pm 0.41$                                                   | 0.991                                                                     | 2.378                                          | $51.22 \pm 0.97$                                                        |
| CNF/SCND-9    | 90                         | $33.41 \pm 1.12$                                                   | 0.732                                                                     | 3.117                                          | $76.23 \pm 2.56$                                                        |

- [1] H. Zeng, J. Wu, H. Pei, et al. Highly thermally conductive yet mechanically robust composites with nacre-mimetic structure prepared by evaporation-induced self-assembly approach [J]. *Chemical Engineering Journal*, 2021, 405: 126865.
- [2] G. Pan, Y. Yao, X. Zeng, et al. Learning from Natural Nacre: Constructing Layered Polymer Composites with High Thermal Conductivity [J]. *ACS Appl Mater Interfaces*, 2017, 9(38): 33001-10.
- [3] X. Wang, P. Wu. Fluorinated Carbon Nanotube/Nanofibrillated Cellulose Composite Film with Enhanced Toughness, Superior Thermal Conductivity, and Electrical Insulation [J]. *ACS Appl Mater Interfaces*, 2018, 10(40): 34311-21.
- [4] K. Wu, J. Fang, J. Ma, et al. Achieving a Collapsible, Strong, and Highly Thermally Conductive Film Based on Oriented Functionalized Boron Nitride Nanosheets and Cellulose Nanofiber [J]. *ACS Appl Mater Interfaces*, 2017, 9(35): 30035-45.
- [5] N. Song, S. Cui, X. Hou, et al. Significant Enhancement of Thermal Conductivity in Nanofibrillated Cellulose Films with Low Mass Fraction of Nanodiamond [J]. *ACS Applied Materials & Interfaces*, 2017, 9(46): 40766-73.
- [6] Q. Yan, W. Dai, J. Gao, et al. Ultrahigh-Aspect-Ratio Boron Nitride Nanosheets Leading to Superhigh In-Plane Thermal Conductivity of Foldable Heat Spreader [J]. *ACS Nano*, 2021, 15(4): 6489-98.
- [7] S. Cui, N. Song, L. Shi, et al. Enhanced Thermal Conductivity of Bioinspired Nanofibrillated Cellulose Hybrid Films Based on Graphene Sheets and Nanodiamonds [J]. *ACS Sustainable Chemistry & Engineering*, 2020, 8(16): 6363-70.
- [8] S. Yang, X. Sun, J. Shen, et al. Interface Engineering Based on Polydopamine-Assisted Metallization in Highly Thermal Conductive Cellulose/Nanodiamonds Composite Paper [J]. *ACS Sustainable Chemistry & Engineering*, 2020, 8(48): 17639-50.
- [9] W. Qiu, W. Lin, Y. Tuersun, et al. Ultra-Flexible, Dielectric, and Thermostable Boron Nitride-Graphene Fluoride Hybrid Films for Efficient Thermal Management [J]. *Advanced Materials Interfaces*, 2021, 8: 2002187.
- [10] Z. Hu, S. Wang, G. Chen, et al. An aqueous-only, green route to exfoliate boron nitride for preparation of high thermal conductive boron nitride nanosheet/cellulose nanofiber flexible film [J]. *Composites Science and Technology*, 2018, 168: 287-95.
- [11] X. Wu, W. Liu, C. Zhang, et al. Grafting rubber chains onto boron nitride nanosheets for highly

flexible, thermally conductive composites [J]. *European Polymer Journal*, 2018, 100: 12-7.

[12]J. Hu, H. Xia, X. Hou, et al. Enhanced thermal management performance of nanofibrillated cellulose composite with highly thermally conductive boron phosphide [J]. *Journal of Materials Chemistry A*, 2021, 9(47): 27049-60.

[13]W. Yang, Z. Zhao, K. Wu, et al. Ultrathin flexible reduced graphene oxide/cellulose nanofiber composite films with strongly anisotropic thermal conductivity and efficient electromagnetic interference shielding [J]. *Journal of Materials Chemistry C*, 2017, 5(15): 3748-56.

[14]X. Zeng, L. Ye, S. Yu, et al. Artificial nacre-like papers based on noncovalent functionalized boron nitride nanosheets with excellent mechanical and thermally conductive properties [J]. *Nanoscale*, 2015, 7(15): 6774-81.
